# Supplementary material
Source: PubMed Central journal article supplement (PMC2731638)
Supplement: blood-2009-03-212704_2.pdf [file blood-2009-03-212704_2.pdf]

| Gene             | Primers sequences             | Annealing temperature | PCR product |
|------------------|-------------------------------|-----------------------|-------------|
| ZNF198-FGFR1-FWD | 5'- ACTCCTTCTCTAGGCGCCGGAA    | 60°C                  | 2.8 kb      |
| ZNF198-FGFR1-RVS | 5'- GTTGCCCTTGGAGGCATACTCCA   |                       |             |
| GAPDH-FWD        | 5'- CATGGCCTTCCGTGTTTCCTA     | 60°C                  | 150 bp      |
| GAPDH-RVS        | 5'- CTGGTCCTCAGTGTAGCCCAA     |                       |             |
| Dβ1,             | 5'-TTATCTGGTGGTTTCTTCCAGC     |                       |             |
| Dβ2,             | 5'-GCACCTGTGGGGAAGAAACT       |                       |             |
| Jβ1.6,           | 5'-GGTAGAAAGGTAGAGGGTTCCAGA   |                       |             |
| Jβ2.6,           | 5'-TGAGAGCTGTCTCCTACTATCGATT  |                       |             |
| TCRα ADV10-FWD,  | 5'-AGACTGACATCCACTACAGTCAT    | 60°C                  |             |
| TCRα J56-RVS,    | 5'-CTGGTATAAACAATCAGAACGGTTCC |                       |             |
| TCRδ V4-FWD,     | 5'-GATCCTGCCTCCTTCTACTGCACT   | 60°C                  |             |
| TCRδ J2-RVS,     | 5'-ACATCTGTTCGGGTGTCCCAGGA    |                       |             |
| TCRα-FWD         | 5'-GCCAGTCTGCATTTCTCGCTACAC   | 60°C                  | 422 bp      |
| TCRα-RVS         | 5'-CAGTCAACGTGGCATCACAGGGAA   |                       |             |
| BCL2(1+2)-FWD    | 5'- GCATCTTCTCCTTCCAGCCTGAGA  | 60°C                  | 273 bp      |
| BCL2(1+2)--RVS:  | 5'- CATCCCTGAAGAGTTCCTCCACCA  |                       |             |
| IL7R-FWD:        | 5'- GCTCCCTCTGACCTGAAAGTCGTT  | 60°C                  | 350 bp      |
| IL7R -RVS:       | 5'- ATGGTGACACTTGGCAAGACAGGA  |                       |             |
